# Supplementary material for: A simple, cyanovinylene-based, ratiometric, colorimetric and fluorescent chemodosimeter for the specific and sensitive detection of HClO in living cells
Source: Royal Society of Chemistry journal article supplement (doi:10.1039/c7nj01654a), 2017-01-01
Supplement: c7nj01654a1.pdf [file c7nj01654a1.pdf]

## Supporting Information

**A simple, cyanovinylene-based, ratiometric, colorimetric and fluorescent chemodosimeter for the specific and sensitive detection of HClO in living cells**

Yawei Wang, Wei Shu, Bingjun Han, Xiangwei Zhao, Liu Wu, Caiyun Liu, Zhenmin

Ma, Baocun Zhu,\* and Bin Du \*

School of Resources and Environment, University of Jinan, Shandong Provincial Engineering Technology Research Center for Ecological Carbon Sink and Capture Utilization, Jinan 250022, P. R. China.

\* *Corresponding author. fax: +86-531-82767617; Tel.: +86-531-82767617*

*E-mail address: lcyzbc@163.com (B. Zhu), dubin61@gmail.com (B. Du).*

### **Preparation of stock solutions of various analytes**

The stock solutions of  $K^+$ ,  $Na^+$ ,  $Ca^{2+}$ ,  $Zn^{2+}$ ,  $Mg^{2+}$ ,  $NO_3^-$ , and  $NO_2^-$  were prepared by dissolving the commercial reagents KCl, NaCl,  $CaCl_2$ ,  $ZnSO_4$ ,  $MgCl_2$ ,  $NaNO_3$ , and  $NaNO_2$  in ultrapure water. Nitric oxide (NO) was generated from potassium nitroprusside dehydrate in ultrapure water. The stock solutions of glutathione (GSH) and cysteine (Cys) were prepared by dissolving the commercial reagents reduced glutathione and DL-cysteine.  $H_2O_2$  and *tert*-butylhydroperoxide (TBHP) were diluted from the commercially available solution to the desired concentration in ultrapure water. Hydroxyl radical ( $\cdot OH$ ) and *tert*-butoxy radical ( $\cdot O^tBu$ ) were generated by Fenton reactions. Superoxide ( $O_2^{\cdot -}$ ) was prepared from  $KO_2$  in DMSO. Singlet oxygen ( $^1O_2$ ) was generated from HOCl and  $H_2O_2$ . The stock solutions of ascorbic acid (AA) and sodium periodate were prepared by dissolving the commercial corresponding reagents.
